# Supplementary material for: A chiral molecular bowl containing three ferrocenes: synthesis and its efficiency in an optical resolution of 1,1′-bi-2-naphthol
Source: Royal Society of Chemistry journal article supplement (doi:10.1039/b316520e), 2004-01-01
Supplement: b316520e.doc [file b316520e.doc]

# *Supporting Information for*

**A chiral molecular bowl containing three ferrocenes: synthesis and its efficiency in an optical resolution of 1,1’-bi-2-naphtol**

## Bog Ki Hong, In Su Lee, Dong Mok Shin and Young Keun Chung*

*School of Chemistry and Center for Molecular Catalysis, Seoul National University, Seoul 151-747, Korea*

**General**

All reactions were conducted under nitrogen using standard Schlenk-type flasks. Workup procedures were done in air. All solvents were dried and distilled according to standard methods before use. Reagents were purchased from Aldrich Chemical Co., Acros Chemical Co. and were used as received. 1H, 13C NMR spectra were obtained with a Bruker 300 spectrometer. High Resolution Mass spectra were measured at the Korea Basic Science Institute (Daegu) and Elemental analyses were done at the National Center For Inter-University Research Facilities, Seoul National University. The enantiomeric excesses (% ee) were determined by chiral HPLC analysis. A CHIRALPAK OT(+) 0.46 cm  25 cm column (Daicel Chemical Ind., Ltd) was used.

**Synthesis of (*R*)-3.**

To a solution of (*1R,2R*)-1,2-diaminocyclohexane ((*1R,2R*)-**2**) (1.0 g, 8.7 mmol) with molecular sieves in CH2Cl2 (20 mL) was added 1,1’-ferrocenedicarboxaldehyde (**1**) (2.1 g, 8.7 mmol). The resulting solution was stirred for 2 days at room temperature and then filtered off any solids. The filtrate was concentrated and poured into hexane. The precipitate was collected and dried under vacuum, affording 2.2 g of orange solids in 79 % yield. 1H NMR (300 MHz, CDCl3):  8.18 (s, 6 H), 4.45 (s, 6 H), 4.37 (s, 6 H), 4.04 (s, 6 H), 3.89 (s, 6 H), 3.43-3.40 (m, 6 H), 1.86-1.68 (m, 18 H), 1.56-1.53 (m, 6 H); 13C NMR (75 MHz, CDCl3, TMS):  160.25, 81.47, 75.31, 72.52, 71.84, 70.95, 68.48, 33.78, 24.88; HRMS (M + H+) for C54H60Fe3N6: calcd. 960.2928, obsd 960.2935; Anal. Calcd.: C, 67.52; H, 6.30; N, 8.75. Found: C, 67.86; H 6.35; N 8.51.

**Synthesis of (*S*)-3.**

The same procedure as the synthesis of (*R*)-**3** was applied except (1*S*,2*S*)-1,2-diaminocyclohexane instead of (*1R,2R*)-**2**. Yield: 76 %. 1H NMR (300 MHz, CDCl3):  8.18 (s, 6 H), 4.45 (s, 6 H), 4.37 (s, 6 H), 4.05 (s, 6 H), 3.89 (s, 6 H), 3.47-3.41 (m, 6 H), 1.86-1.69 (m, 18 H), 1.56-1.53 (m, 6 H); 13C NMR (75 MHz, CDCl3):  160.29, 81.46, 75.29, 72.59, 71.81, 70.93, 68.38, 33.77, 24.87; HRMS (M+H+) for C54H60Fe3N6: Calcd. 960.2928, obds. 960.2931; Anal. Calcd.: C, 67.52; H, 6.30; N, 8.75. Found: C, 67.74; H, 6.33; N, 8.48.

**Cocrystal of (*R*)-3·(*R*)-4 from (*R*)-3/(*R*)-4.**

When (*R*)-**3** (50 mg, 0.052 mmol) and (*R*)**-4** (15 mg, 0.05 mmol) were dissolved together in CHCl3 and diethyl ether was layered onto the solution, orange block-like crystals were gradually grown at the interface of the two solutions over a few days. Yield: 90 %. 1H NMR (300 MHz, CDCl3):  8.18 (s, 6 H), 7.97 (d, 8.8 Hz, 2 H), 7.89 (d, 8.3 Hz, 2 H), 7.41-7.30 (m, 6 H), 7.17 (d, 8.3 Hz, 2 H), 4.43 (s, 6 H), 4.35 (s, 6 H), 4.05 (s, 6 H), 3.88 (s, 6 H), 3.47-3.41 (m, 6 H), 1.85-1.69 (m, 18 H), 1.55-1.52 (m, 6 H); Anal. Calcd. for C74H78O4Fe3N6·0.5CHCl3: C, 66.64; H, 5.89; N, 6.26. Found: C, 66.45; H, 6.13; N, 6.04.

**Cocrystal of (*R*)-3·(*R*)-4’ from (*R*)-3/rac-4.**

When (*R*)-**3** (50 mg, 0.052 mmol) and (±)**-4** (30 mg, 0.10 mmol) were dissolved together in CHCl3 and diethyl ether was layered onto the solution, orange block-like crystals were gradually grown at the interface of the two solutions over a few days. Yield: 92 %. 1H NMR (300 MHz, CDCl3):  8.16 (s, 6 H), 7.93 (d, 8.6 Hz, 2 H), 7.87 (d, 7.9 Hz, 2 H), 7.37-7.28 (m, 6 H), 7.16 (d, 8.2 Hz, 2 H), 4.41 (s, 6 H), 4.34 (s, 6 H), 4.04 (s, 6 H), 3.86 (s, 6 H), 3.47-3.41 (m, 6 H), 1.84-1.68 (m, 18 H), 1.53-1.50 (m, 6H); Anal. Calcd. for C74H78O4Fe3N6·4H2O: C, 65.59; H, 6.40; N, 6.20. Found: C, 65.84; H, 6.11; N, 6.06.

**Synthesis of (*R*)-5.**

The same procedure as the synthesis of (*R*)-**3** was applied except (1*R*,2*R*)-1,2-diphenylethylenediamine instead of (*1R,2R*)-**2**. Yield: 73 %. Single crystal of *(R)*-**5** was grown at the interface of dichloromethane solution of *(R)*-**5** and diethyl ether layer. 1H NMR (300 MHz, CDCl3, TMS):  7.48 (s, 6 H), 7.26-7.22 (m, 30 H), 7.13-7.08 (m, 6 H), 4.91 (s, 6 H), 4.43 (s, 6 H), 4.10 (s, 6 H), 4.03 (s, 6 H); 13C NMR (75 MHz, CDCl3):  161.33, 142.18, 128.76, 128.64, 128.45, 127.39, 126.30, 70.80; HRMS (M+H+) for C78H68O1Fe3N6: Calcd. 1254.3397, obsd. 1254.3389; Anal. Calcd.: C, 74.65; H, 5.30; N, 6.70. Found: C, 74.34; H, 5.38; N, 6.64.

**Crystal structure determination of (R)-3·(R)-4, (R)-3·(R)-4’, and (R)-5*.*** All diffraction data for structure determination were measured by an Enraf-Nonius CCD single-crystal X-ray diffractometer at room temperature using graphite-monochromated Mo K radiation ( = 0.71073 Å). Preliminary orientation matrices and unit cell parameters were obtained from the peaks of the first 10 frames and then refined using the whole data set. Frames were integrated and corrected for Lorentz and polarization effects using DENZO. The structure was solved by direct methods using SHELXS-97 and refined by full-matrix least-squares with SHELXL-97. All non-hydrogen atoms were refined anisotropically. For (*R*)-**3**·(*R*)-**4**, hydrogen atoms on the O1 and O2 were found in Fourier map and refined, and hydrogen atoms of water molecules could not be refined. Rest of the hydrogen atoms were refined isotropically using the riding model with 1.2 times the equivalent isotropic temperature factors of the atoms to which they are attached. For (*R*)-**3**·(*R*)-**4**’, the hydrogen atoms on each water molecules were found in Fourier map and refined, and the other hydrogen atoms on the O1, and O2 could not be refined. Rest of the hydrogen atoms were refined isotropically using the riding model with 1.2 times the equivalent isotropic temperature factors of the atoms to which they are attached. For *(R)*-**5**, hydrogen atoms on O1 were found in Fourier map and refined. Rest of all hydrogen atoms not involving the hydrogen bonding were treated as idealized contributions.
